# Supplementary material
Source: Atypon-hosted journal article supplement (doi:10.1287/ijoc.2024.1017)
Supplement: ijoc.2024.1017.cd.zip [file Fig_2_CIFAR-10_Results.pdf › 2024.1017-main/results/Fig_2_CIFAR-10_Results.pdf]

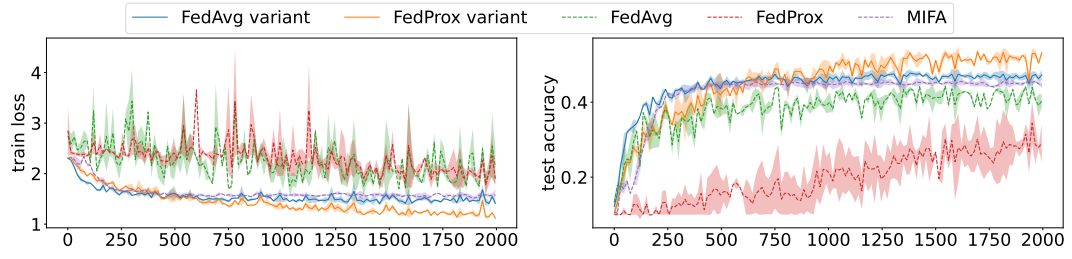

(a) Baseline comparisons.

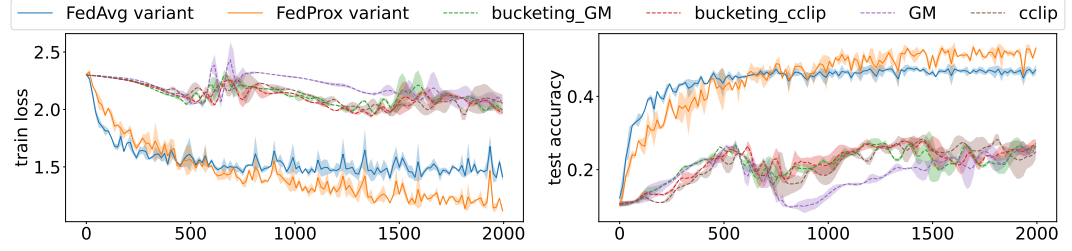

(b) Byzantine comparisons.

Figure 2: CIFAR-10 results with Dirichlet parameter  $\alpha = 0.1$  and dropout fraction  $\epsilon = 0.8$  on adversarial client silence attack scheme in Section 6.1.
