# Supplementary material
Source: Atypon-hosted journal article supplement (doi:10.1287/ijoc.2024.1017)
Supplement: ijoc.2024.1017.cd.zip [file Fig_3_Shakespeare_Results.pdf › 2024.1017-main/results/Fig_3_Shakespeare_Results.pdf]

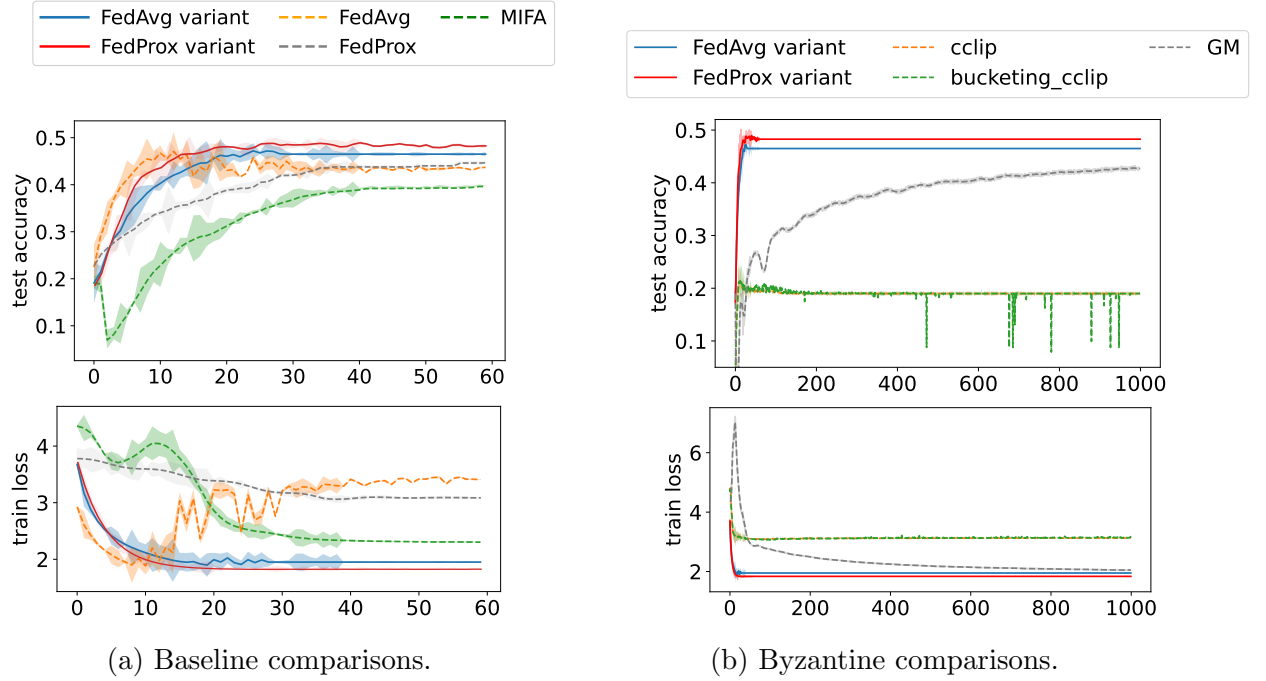

Figure 3: Natural language processing task with dropout fraction  $\epsilon = 0.7$  on a different adversarial client silence attack scheme, where the adversary inspects each client’s local gradient improvement and removes clients of the greatest improvements subject to Assumption 2. Details can be found in Section 6.3.
