# Supplementary material
Source: Atypon-hosted journal article supplement (doi:10.1287/ijoc.2024.1017)
Supplement: ijoc.2024.1017.cd.zip [file Fig_5_Synthetic_0_9_Byzantine_Results.pdf › 2024.1017-main/results/Fig_5_Synthetic_0_9_Byzantine_Results.pdf]

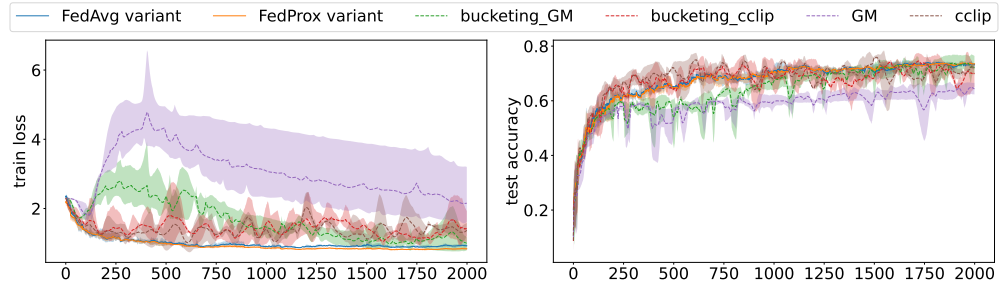

Figure 5: Synthetic datasets: comparisons with Byzantine-resilient algorithms with dropout fraction  $\epsilon = 0.9$  on adversarial client s scheme in Section 6.1.
